# Supplementary material
Source: Research Square preprint supplement (doi:10.21203/rs.3.rs-9322004/v1)

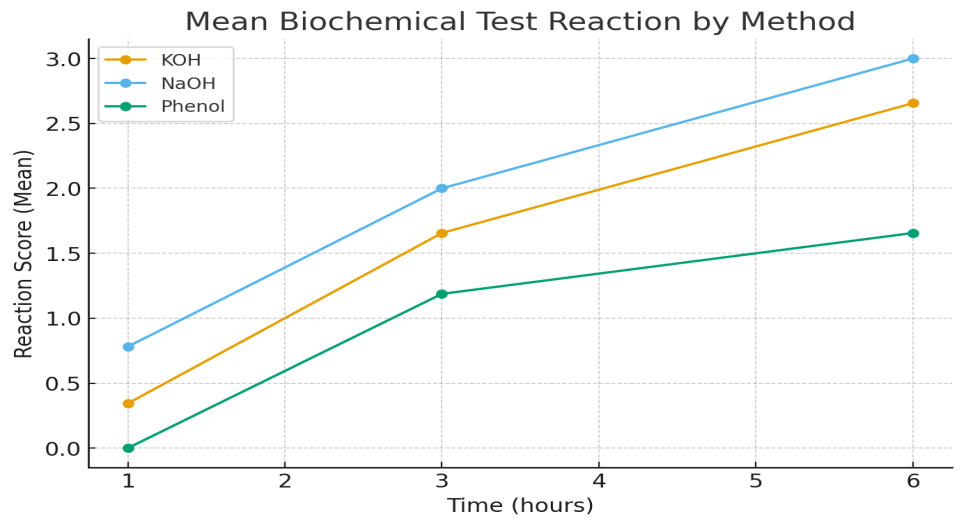


### Graph.1 Reaction score for different tests

Supplement: Supplementary file 1 [file bc7503bc999c24f70caddc08.docx]
